# Supplementary material for: Inoculation effects on root-colonizing arbuscular mycorrhizal fungal communities spread beyond directly inoculated plants
Source: PubMed Central journal article supplement (PMC5524347; doi:10.1371/journal.pone.0181525), 2017-07-24
Supplement: pone.0181525.s002.pdf [file pone.0181525.s002.pdf]

## **S1 Fig. Phylogenetic analysis of the native arbuscular mycorrhizal fungal community.**

The analysis is based on sequences of partial large subunit of nuclear ribosomal DNA, the most parsimonious tree is presented. Bootstrap values higher than 50% are indicated by numbers above or below branches. The sequences obtained in the present study are given in bold.

\* Sequences published by [1]; \*\* sequences published by [2].



## References

1. Krak K, Janoušková M, Čáková P, Vosátka M, Štorchová H. Intraradical Dynamics of Two Coexisting Isolates of the Arbuscular Mycorrhizal Fungus *Glomus intraradices* Sensu Lato as Estimated by Real-Time PCR of Mitochondrial DNA. *Applied and Environmental Microbiology*. 2012;78(10):3630-7. doi: 10.1128/aem.00035-12.
2. Janoušková M, Krak K, Wagg C, Štorchová H, Čáková P, Vosátka M. Effects of Inoculum Additions in the Presence of a Preestablished Arbuscular Mycorrhizal Fungal Community. *Applied and Environmental Microbiology*. 2013;79(20):6507-15. doi: 10.1128/aem.02135-13.
