# Supplementary material for: Inoculation effects on root-colonizing arbuscular mycorrhizal fungal communities spread beyond directly inoculated plants
Source: PubMed Central journal article supplement (PMC5524347; doi:10.1371/journal.pone.0181525), 2017-07-24
Supplement: pone.0181525.s004.pdf [file pone.0181525.s004.pdf]

**S1 Table. Real-time PCR assays in nuclear ribosomal DNA.**

| Target | Primer type | Primer name (primer sequence 5'→3')  | Primer concn (μM) | Ta (°C) | Amplicon size (bp) | Amplification efficiency <sup>a</sup> (% ± SD) | Reference     |
|--------|-------------|--------------------------------------|-------------------|---------|--------------------|------------------------------------------------|---------------|
| RI     | for         | GIX6-F351 (TTCGGGGCTACTTGTCTGAT)     | 0.3               | 62      | 74                 | 99.5 ± 3.1                                     | [1]           |
|        | for         | GIX6-F351b (TTCGGGGCTACCTGTCTGGT)    | 0.2               |         |                    |                                                |               |
|        | rev         | GIX6-R424 (CCATCGACTTTGATAACCGTAA)   | 0.5               |         |                    |                                                |               |
| CC     | for         | GCX14-F300 (CTTTAGCGGAATGTGGTGGT)    | 0.5               | 58      | 132                | 92.4 ± 2.4                                     | [2]           |
|        | rev         | GCX14-R431 (TAGCCTGTTCAAAGGCGAAT)    | 0.5               |         |                    |                                                |               |
| FM     | for         | GMX2-F2 (CATACCAATGGGAAATCAACC)      | 0.25              | 60      | 112/<br>122        | 93.9 ± 1.8                                     | [2]           |
|        | for         | GMX10-F (CGGGAAATCAACCTTTTGAG)       | 0.25              |         |                    |                                                |               |
|        | rev         | GMX2-R2 (CCGATGTTGACTAACTATACGAAAAA) | 0.25              |         |                    |                                                |               |
|        | rev         | GMX10-R1 (CGATGTTGACTAACCGTACGAA)    | 0.25              |         |                    |                                                |               |
| UN     | for         | UN-119F (TGTTGAAAGGGAAACGATTGA)      | 0.4               | 58      | 77                 | 92.4 ± 2.8                                     | Present study |
|        | rev         | UN-195R (ACGCACGCCACAAGTTC)          | 0.4               |         |                    |                                                |               |
| DC     | for         | DC-135F (ATTGAAGTCAGTCATGCTAGT)      | 0.4               | 62      | 80                 | 93.7 ± 1.4                                     | Present study |
|        | rev         | DC-214R (GAGAAACGGTTTGACCCT)         | 0.4               |         |                    |                                                |               |

The assays were used for the quantification of the arbuscular mycorrhizal fungal clades *Rhizophagus irregularis* (RI), *Claroideoglomus claroideum* (CC), *Funneliformis mosseae* (FM), 'uncultured Glomeraceae' (UN) and *Diversispora celata* (DC).

<sup>a</sup> Amplification efficiency was calculated from at least three independent dilutions of plasmid templates.

## References

1. Krak K, Janoušková M, Caklová P, Vosátka M, Štorchová H. Intraradical Dynamics of Two Coexisting Isolates of the Arbuscular Mycorrhizal Fungus *Glomus intraradices* Sensu Lato as Estimated by Real-Time PCR of Mitochondrial DNA. *Applied and Environmental Microbiology*. 2012;78(10):3630-7. doi: 10.1128/aem.00035-12.
2. Janoušková M, Krak K, Wagg C, Štorchová H, Caklová P, Vosátka M. Effects of Inoculum Additions in the Presence of a Preestablished Arbuscular Mycorrhizal Fungal Community. *Applied and Environmental Microbiology*. 2013;79(20):6507-15. doi: 10.1128/aem.02135-13.
