# Supplementary material for: Inoculation effects on root-colonizing arbuscular mycorrhizal fungal communities spread beyond directly inoculated plants
Source: PubMed Central journal article supplement (PMC5524347; doi:10.1371/journal.pone.0181525), 2017-07-24
Supplement: pone.0181525.s005.pdf [file pone.0181525.s005.pdf]

**S2 Table. Real-time PCR assays in mitochondrial ribosomal DNA.**

| Target           | Primer type | Primer name (primer sequence 5'→3')           | Primer concn (μM) | Ta (°C) | Amplicon size (bp) | Amplification efficiency <sup>a</sup> (% ± SD) | Reference |
|------------------|-------------|-----------------------------------------------|-------------------|---------|--------------------|------------------------------------------------|-----------|
| Inoculant        | for         | GI-CH-mtLSU-2545F<br>(TGGATTTCTGGTTTTGTAGACG) | 0.4               | 60      | 94                 | 92.8 ± 1.4                                     | [1]       |
|                  | rev         | GI-CH-mtLSU-2638R<br>(ATTCTGCTTGTGGTTGTATTCC) | 0.4               |         |                    |                                                |           |
| Native genotypes | for         | GI-PH5-mtLSU-219F<br>(CAATTTGGCTGTATGCTGGA)   | 0.4               | 60      | 119                | 95.6 ± 3.1                                     | [1]       |
|                  | rev         | GI-PH5-mtLSU-327R<br>(GTGGTCGTTGAGGGGTAAA)    | 0.4               |         |                    |                                                |           |

The assays were used for the quantification of the inoculant *R. irregularis* Chomutov and the native genotypes of *Rhizophagus irregularis*.

<sup>a</sup> Amplification efficiency was calculated from at least three independent dilutions of plasmid templates.

## Reference

1. Krak K, Janoušková M, Caklová P, Vosátka M, Štorchová H. Intraradical Dynamics of Two Coexisting Isolates of the Arbuscular Mycorrhizal Fungus *Glomus intraradices* Sensu Lato as Estimated by Real-Time PCR of Mitochondrial DNA. Applied and Environmental Microbiology. 2012;78(10):3630-7. doi: 10.1128/aem.00035-12.
