# Supplementary material for: Inoculation effects on root-colonizing arbuscular mycorrhizal fungal communities spread beyond directly inoculated plants
Source: PubMed Central journal article supplement (PMC5524347; doi:10.1371/journal.pone.0181525), 2017-07-24
Supplement: pone.0181525.s006.pdf [file pone.0181525.s006.pdf]

**S3 Table. Variation in root colonization.**

| Factors and interactions | AMF substrate |           | Control substrate |          |
|--------------------------|---------------|-----------|-------------------|----------|
|                          | df            | F         | df                | F        |
| Plant species (A)        | 1             | 8.70 **   | 1                 | 4.95 *   |
| Inoculation (B)          | 2             | 1.24      | 1                 | 3.12     |
| Stage (C)                | 2             | 10.38 *** | 2                 | 9.65 *** |
| A × B                    | 2             | 1.26      | 1                 | 0.05     |
| A × C                    | 2             | 1.41      | 2                 | 5.87 **  |
| B × C                    | 4             | 2.63 *    | 2                 | 2.36     |
| A × B × C                | 4             | 0.81      | 2                 | 0.10     |
| Residual                 | 84            |           | 56                |          |

ANOVA results are shown; separate ANOVAs were performed for the AMF substrate with native AMF community and the sterilized control substrate. The factor inoculation comprised three levels (no inoculation, in-situ inoculation, pre-inoculation) for the AMF substrate and two levels (in-situ inoculation, pre-inoculation) for the control substrate. Significance levels: \*  $P < 0.05$ ; \*\*  $P < 0.01$ ; \*\*\*  $P < 0.001$ .
