# Supplementary material for: Inoculation effects on root-colonizing arbuscular mycorrhizal fungal communities spread beyond directly inoculated plants
Source: PubMed Central journal article supplement (PMC5524347; doi:10.1371/journal.pone.0181525), 2017-07-24
Supplement: pone.0181525.s007.pdf [file pone.0181525.s007.pdf]

**S4 Table. Root colonization of the experimental plants.**

| Stage | Inoculation | <i>M. sativa</i> |         | <i>P. arundinacea</i> |         |
|-------|-------------|------------------|---------|-----------------------|---------|
|       |             | AMF              | Control | AMF                   | Control |
| D6    | NI          | 64 (10)          | 0       | 63 (15)               | 0       |
|       | in-situ     | 64 (14)          | 84 (10) | 76 (20)               | 84 (10) |
|       | pre         | 55 (20)          | 65 (26) | 52 (10)               | 65 (26) |
| D12   | NI          | 61 (13)          | 0       | 71 (15)               | 0       |
|       | in-situ     | 70 (19)          | 65 (8)  | 83 (7)                | 89 (12) |
|       | pre         | 55 (16)          | 61 (18) | 77 (15)               | 88 (4)  |
| N6    | NI          | 81 (12)          | 0       | 83 (13)               | 0       |
|       | in-situ     | 64 (8)           | 93 (2)  | 81 (16)               | 87 (14) |
|       | pre         | 80 (15)          | 91 (8)  | 81 (10)               | 93 (2)  |

Data show percentage of root colonization by arbuscular mycorrhizal fungi, means of 6 replicates (SD). The plants were grown in substrate with native AMF community (AMF) or sterilized control substrate (Control); non-inoculated (NI), inoculated in-situ (in-situ) or pre-inoculated (pre) with *R. irregularis* 'Chomutov'. D6 and D12 are directly inoculated donor plants harvested after six or 12 weeks of cultivation, respectively; N6 are six-week-old neighboring plants.
