# Supplementary material for: Inoculation effects on root-colonizing arbuscular mycorrhizal fungal communities spread beyond directly inoculated plants
Source: PubMed Central journal article supplement (PMC5524347; doi:10.1371/journal.pone.0181525), 2017-07-24
Supplement: pone.0181525.s008.pdf [file pone.0181525.s008.pdf]

**S5 Table. Variation in the abundance of the inoculant *R. irregularis* Chomutov.**

| <b>Factors and interactions</b> | <b>df</b> | <b>F</b> |
|---------------------------------|-----------|----------|
| Substrate (A)                   | 1         | 5.22 *   |
| Plant species (B)               | 1         | 3.89     |
| Inoculation (C)                 | 1         | 0.00     |
| Stage (D)                       | 2         | 1.54     |
| A × B                           | 1         | 6.26 *   |
| A × C                           | 1         | 0.00     |
| B × C                           | 1         | 3.35     |
| A × D                           | 2         | 1.95     |
| B × D                           | 2         | 1.49     |
| C × D                           | 2         | 0.50     |
| A × B × C                       | 1         | 0.16     |
| A × B × D                       | 2         | 1.67     |
| A × C × D                       | 2         | 0.02     |
| B × C × D                       | 2         | 0.64     |
| A × B × C × D                   | 2         | 0.81     |
| Residual                        | 108       |          |

The abundance was determined as copy numbers of mitochondrial ribosomal DNA. ANOVA results are shown; significance level: \*  $P < 0.05$ .
