# Supplementary material for: Inoculation effects on root-colonizing arbuscular mycorrhizal fungal communities spread beyond directly inoculated plants
Source: PubMed Central journal article supplement (PMC5524347; doi:10.1371/journal.pone.0181525), 2017-07-24
Supplement: pone.0181525.s009.pdf [file pone.0181525.s009.pdf]

**S6 Table. Variation in the proportion of the inoculant and the abundance of native *R. irregularis*.**

| Factors and interactions | Inoculant % |         | Native <i>R. irregularis</i> |           |
|--------------------------|-------------|---------|------------------------------|-----------|
|                          | df          | F       | df                           | F         |
| Plant species (A)        | 1           | 5.46 *  | 1                            | 0.00      |
| Inoculation (B)          | 1           | 0.23    | 2                            | 67.00 *** |
| Plant stage (C)          | 2           | 4.60 *  | 2                            | 4.68 *    |
| A × B                    | 1           | 3.37    | 2                            | 0.69      |
| A × C                    | 2           | 1.44    | 2                            | 1.23      |
| B × C                    | 2           | 5.29 ** | 4                            | 2.60 *    |
| A × B × C                | 2           | 0.10    | 4                            | 1.92      |
| Residual                 | 53          |         | 82                           |           |

Proportion of inoculated *R. irregularis* Chomutov at the total *R. irregularis* population (Inoculant %) is based on copy numbers of mitochondrial ribosomal DNA; abundance of the native *R. irregularis* genotypes was determined as copy numbers of mitochondrial ribosomal DNA. ANOVA results are shown; the factor inoculation comprised two levels (in-situ, pre-inoculation) for Inoculant % and three levels (no inoculation, in-situ, pre-inoculation) for native *R. irregularis*. Significance levels: \* P < 0.05; \*\* P < 0.01; \*\*\* P < 0.001.
