# Supplementary material for: Inoculation effects on root-colonizing arbuscular mycorrhizal fungal communities spread beyond directly inoculated plants
Source: PubMed Central journal article supplement (PMC5524347; doi:10.1371/journal.pone.0181525), 2017-07-24
Supplement: pone.0181525.s010.pdf [file pone.0181525.s010.pdf]

**S7 Table. Abundances of native *R. irregularis* and inoculated *R. irregularis* Chomutov.**

| Stage | Inoculation | Native <i>R. irregularis</i><br>AMF substrate |           | Inoculant<br>AMF substrate |           | Inoculant<br>Control substrate |           |
|-------|-------------|-----------------------------------------------|-----------|----------------------------|-----------|--------------------------------|-----------|
|       |             | <i>MS</i>                                     | <i>PA</i> | <i>MS</i>                  | <i>PA</i> | <i>MS</i>                      | <i>PA</i> |
| D6    | NI          | 440 (238)                                     | 441 (128) | 0                          | 0         | 0                              | 0         |
|       | in-situ     | 171 (136)                                     | 77 (58)   | 482 (310)                  | 348 (187) | 448 (315)                      | 626 (404) |
|       | pre         | 83 (70)                                       | 50 (51)   | 594 (304)                  | 211 (79)  | 440 (308)                      | 449 (223) |
| D12   | NI          | 220 (101)                                     | 281 (112) | 0                          | 0         | 0                              | 0         |
|       | in-situ     | 43 (35)                                       | 35 (24)   | 556 (139)                  | 360 (120) | 393 (141)                      | 536 (284) |
|       | pre         | 67 (32)                                       | 108 (68)  | 699 (273)                  | 336 (55)  | 605 (215)                      | 460 (302) |
| N6    | NI          | 588 (501)                                     | 327 (75)  | 0                          | 0         | 0                              | 0         |
|       | in-situ     | 105 (70)                                      | 151 (129) | 343 (131)                  | 300 (22)  | 458 (178)                      | 563 (222) |
|       | pre         | 46 (49)                                       | 115 (42)  | 334 (124)                  | 354 (95)  | 514 (139)                      | 466 (112) |

Abundances are given in thousands of copy numbers of mitochondrial ribosomal DNA in the roots of *Medicago sativa* (*MS*) or *Phalaris arundinacea* (*PA*) grown in substrate with native AMF community (AMF substrate) or sterilized control substrate; non-inoculated (NI), inoculated in-situ (in-situ) or pre-inoculated (pre) with the inoculant, *R. irregularis* ‘Chomutov’. D6 and D12 are directly inoculated donor plants harvested after six or 12 weeks of cultivation, respectively; N6 are six-week-old neighboring plants. Data are means of 4-6 replicates (SD), see S12 Table for exact replicate numbers.
