# Supplementary material for: Inoculation effects on root-colonizing arbuscular mycorrhizal fungal communities spread beyond directly inoculated plants
Source: PubMed Central journal article supplement (PMC5524347; doi:10.1371/journal.pone.0181525), 2017-07-24
Supplement: pone.0181525.s012.pdf [file pone.0181525.s012.pdf]

**S9 Table. Abundances of *C. claroideum*, 'uncultured Glomeraceae' and *F. mosseae*.**

| Stage | Inoculation | <i>C. claroideum</i> |           | 'uncult. Glomeraceae' |             | <i>F. mosseae</i> |             |
|-------|-------------|----------------------|-----------|-----------------------|-------------|-------------------|-------------|
|       |             | <i>MS</i>            | <i>PA</i> | <i>MS</i>             | <i>PA</i>   | <i>MS</i>         | <i>PA</i>   |
| D6    | NI          | 19.7 (9.0)           | 5.9 (4.5) | 14.2 (10.3)           | 6.2 (3.8)   | 64.9 (7.5)        | 72.6 (26.8) |
|       | in-situ     | 14.7 (11.7)          | 4.0 (3.5) | 7.8 (6.1)             | 2.7 (2.8)   | 40.1 (33.2)       | 20.7 (17.9) |
|       | pre         | 9.0 (8.8)            | 2.3 (1.9) | 2.3 (0.6)             | 3.0 (1.9)   | 7.2 (7.4)         | 5.5 (5.4)   |
| D12   | NI          | 12.4 (7.7)           | 3.0 (1.8) | 23.0 (15.8)           | 56.1 (50.1) | 12.2 (9.7)        | 21.8 (7.9)  |
|       | in-situ     | 5.5 (3.3)            | 0.5 (0.4) | 7.0 (5.9)             | 1.6 (1.4)   | 4.3 (2.8)         | 11.0 (8.0)  |
|       | pre         | 6.9 (4.1)            | 0.6 (0.4) | 9.1 (7.8)             | 3.4 (1.4)   | 2.4 (3.2)         | 23.9 (15.7) |
| N6    | NI          | 7.3 (6.3)            | 1.5 (0.7) | 7.0 (4.0)             | 6.4 (4.2)   | 36.1 (23.3)       | 44.4 (17.4) |
|       | in-situ     | 21.3 (30.7)          | 2.1 (1.3) | 5.4 (5.0)             | 1.7 (0.3)   | 28.5 (24.0)       | 30.3 (25.7) |
|       | pre         | 3.8 (3.0)            | 1.4 (1.5) | 6.5 (4.9)             | 0.6 (0.3)   | 10.2 (10.4)       | 16.5 (6.8)  |

Abundances are given in thousands of copy numbers of nuclear ribosomal DNA in the roots of *Medicago sativa* (*MS*) or *Phalaris arundinacea* (*PA*) grown non-inoculated (NI), inoculated in-situ (in-situ) or pre-inoculated (pre) with the *R. irregularis* 'Chomutov'. D6 and D12 are directly inoculated donor plants harvested after six or 12 weeks of cultivation, respectively; N6 are six-week-old neighboring plants. Data are means of 4-6 replicates (SD), see S12 Table for exact replicate numbers.
