# Supplementary material for: Inoculation effects on root-colonizing arbuscular mycorrhizal fungal communities spread beyond directly inoculated plants
Source: PubMed Central journal article supplement (PMC5524347; doi:10.1371/journal.pone.0181525), 2017-07-24
Supplement: pone.0181525.s013.pdf [file pone.0181525.s013.pdf]

**S10 Table. Variation in the abundances of *C. claroideum*, 'uncultured Glomeraceae' and *F. mosseae*.**

| Factors and interactions | <i>C. claroideum</i> |           | 'uncultured Gl.' |           | <i>F. mosseae</i> |           |
|--------------------------|----------------------|-----------|------------------|-----------|-------------------|-----------|
|                          | df                   | F         | df               | F         | df                | F         |
| Plant species (A)        | 1                    | 80,30 *** | 1                | 16,16 *** | 1                 | 9,11 **   |
| Inoculation (B)          | 2                    | 8,40 ***  | 2                | 37,27 *** | 2                 | 37,26 *** |
| Plant stage (C)          | 2                    | 8,63 ***  | 2                | 12,01 *** | 2                 | 14,52 *** |
| A × B                    | 2                    | 0,27      | 2                | 4,97 **   | 2                 | 1,95      |
| A × C                    | 2                    | 0,72      | 2                | 0,99      | 2                 | 9,20 ***  |
| B × C                    | 4                    | 2,36      | 4                | 5,11 **   | 4                 | 6,02 ***  |
| A × B × C                | 4                    | 0,38      | 4                | 3,87 **   | 4                 | 1,12      |
| Residual                 | 82                   |           | 82               |           | 82                |           |

The abundances were determined as copy numbers of nuclear ribosomal DNA. ANOVA results are shown; significance levels: \*\*  $P < 0.01$ ; \*\*\*  $P < 0.001$ .
