# Supplementary material for: Inoculation effects on root-colonizing arbuscular mycorrhizal fungal communities spread beyond directly inoculated plants
Source: PubMed Central journal article supplement (PMC5524347; doi:10.1371/journal.pone.0181525), 2017-07-24
Supplement: pone.0181525.s014.pdf [file pone.0181525.s014.pdf]

**S11 Table. Dry weights of *M. sativa* and *P. arundinacea* D seedlings at planting into the experiment.**

|                | <i>M. sativa</i> | <i>P. arundinacea</i> |
|----------------|------------------|-----------------------|
| inoculated     | 29.4 (5.9)       | 10.6 (4.1)            |
| not inoculated | 38.7 (7.4)       | 20.8 (6.5)            |

The seedlings were either inoculated at germination with *R. irregularis* ‘Chomutov’ (for the pre-inoculation treatment) or left without inoculation (for the non-inoculated and in-situ inoculated experimental treatments). The total dry weights of plants are given in mg, values are means of five replicates (SD).
