# Supplementary material for: Inoculation effects on root-colonizing arbuscular mycorrhizal fungal communities spread beyond directly inoculated plants
Source: PubMed Central journal article supplement (PMC5524347; doi:10.1371/journal.pone.0181525), 2017-07-24
Supplement: pone.0181525.s015.pdf [file pone.0181525.s015.pdf]

**S12 Table. Numbers of evaluated replicates per experimental treatment.**

|                      |         | D6        |           | D12       |           | N6        |           |
|----------------------|---------|-----------|-----------|-----------|-----------|-----------|-----------|
|                      |         | <i>MS</i> | <i>PA</i> | <i>MS</i> | <i>PA</i> | <i>MS</i> | <i>PA</i> |
| AMF<br>substrate     | NI      | 6         | 6         | 6         | 6         | 6         | 6         |
|                      | in-situ | 6         | 6         | <b>5</b>  | <b>4</b>  | <b>5</b>  | <b>4</b>  |
|                      | pre     | 6         | 6         | 6         | <b>5</b>  | 6         | <b>5</b>  |
| Control<br>substrate | NI      | 6         | 6         | 6         | 6         | 6         | 6         |
|                      | in-situ | 6         | 6         | 6         | <b>5</b>  | 6         | <b>5</b>  |
|                      | pre     | 6         | 6         | 6         | <b>4</b>  | 6         | <b>4</b>  |

*Medicago sativa* (*MS*) or *Phalaris arundinacea* (*PA*) plants were grown in AMF substrate or Control substrate, non-inoculated (NI), inoculated in-situ (in-situ) or pre-inoculated (pre) with the *R. irregularis* ‘Chomutov’. D6 and D12 are directly inoculated donor plants harvested after six or 12 weeks of cultivation, respectively; N6 are six-week-old neighboring plants. Decreased replicate numbers due to the dieback of N6 plants are highlighted in bold.
